# Supplementary material
Source: PubMed Central journal article supplement (PMC4655743)
Supplement: supp_kwv109_kwv109supp.pdf [file supp_kwv109_kwv109supp.pdf]

Web Figure 1. Propensity Score Distribution for Primary Cohort:

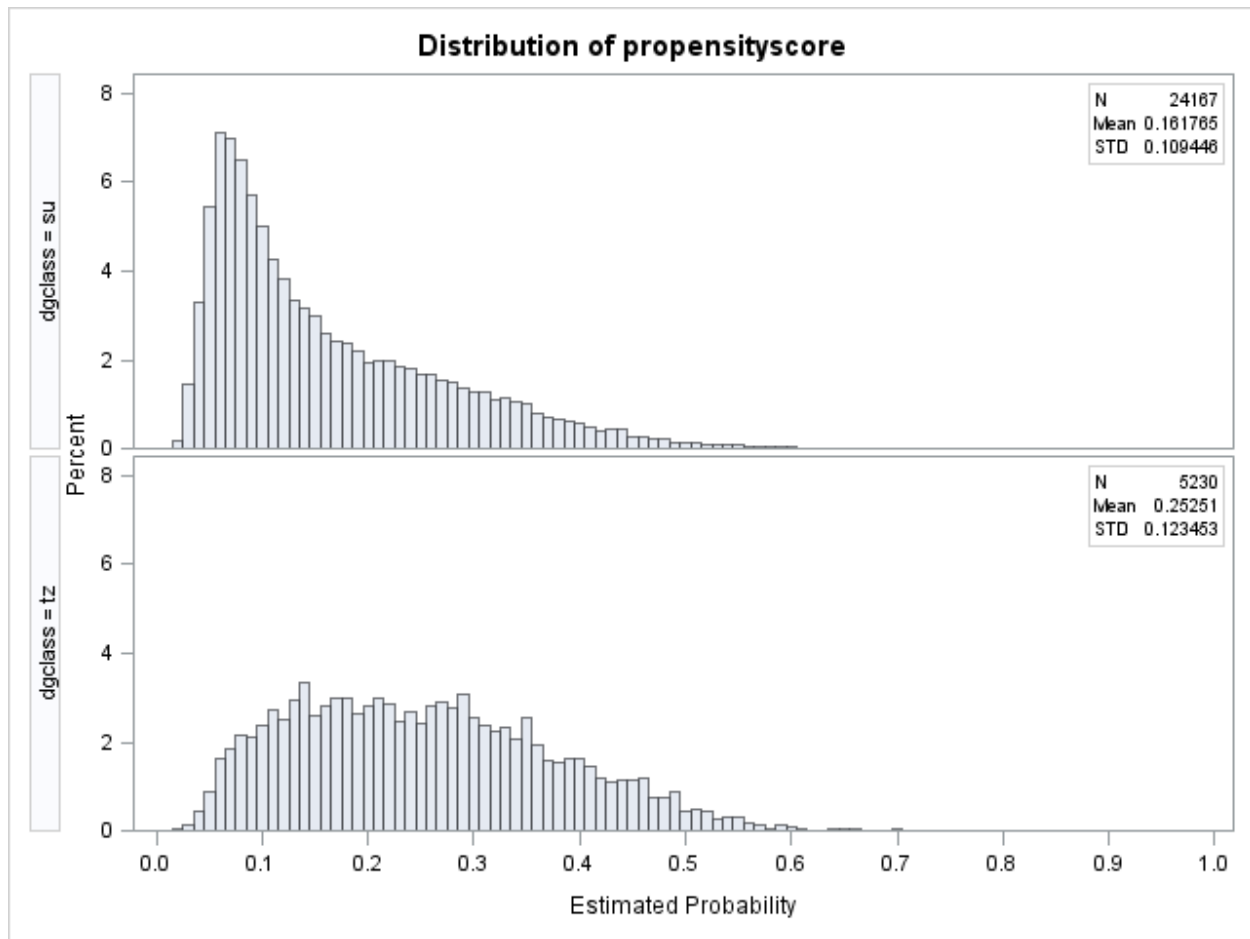

Web Figure 2. Propensity Score Distribution for Secondary Cohort

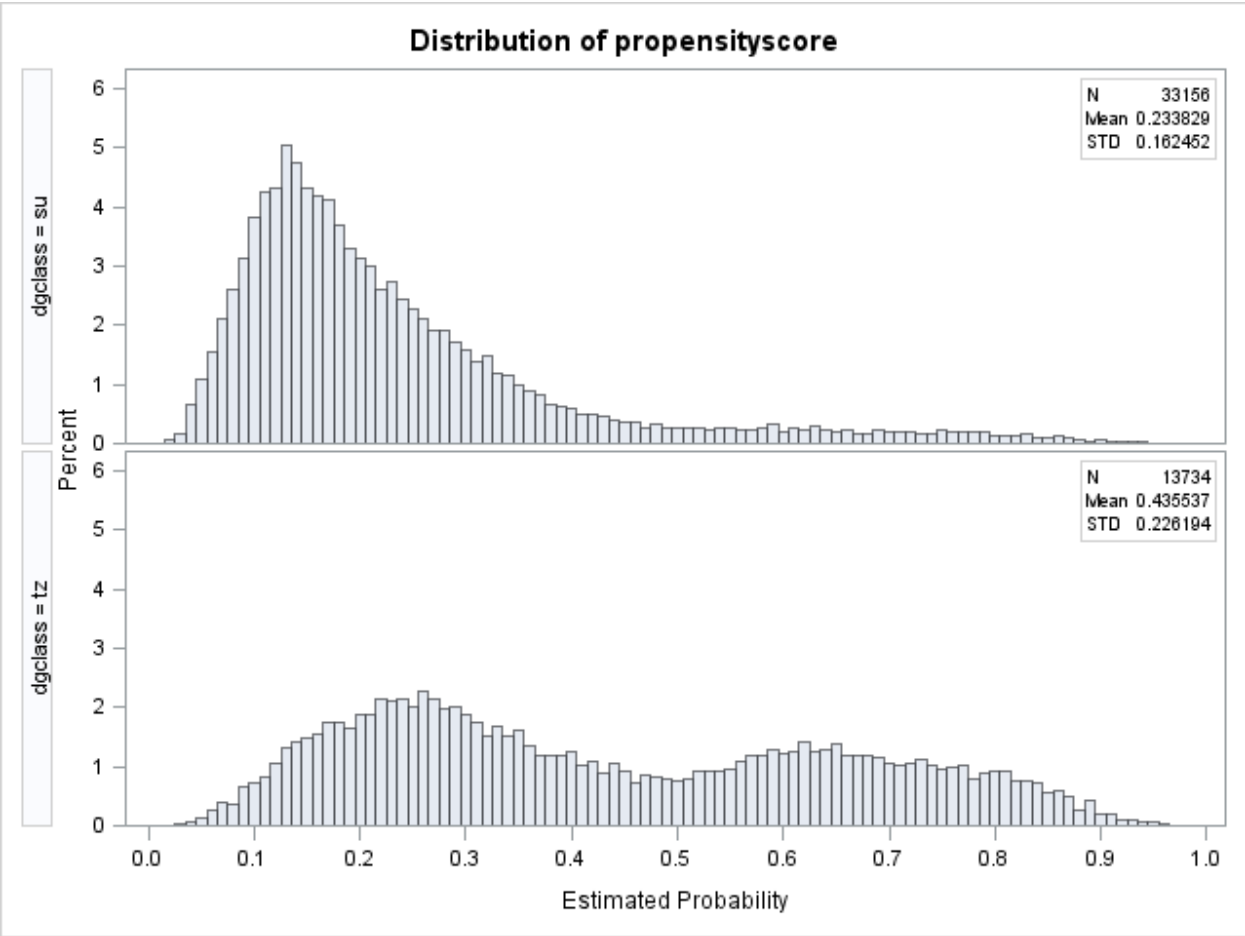

**Web Table 1. Baseline covariates of the secondary cohort**

| Confounder                                   | Unmatched     |                |                         | Matched <sup>a</sup> |                |                         |
|----------------------------------------------|---------------|----------------|-------------------------|----------------------|----------------|-------------------------|
|                                              | SU (N=33,156) | TZD (N=13,734) | Absolute Difference (%) | SU (N=10,953)        | TZD (N=10,953) | Absolute Difference (%) |
| <b>Demographics</b>                          |               |                |                         |                      |                |                         |
| Age, mean (sd)                               | 78.21 (6.99)  | 76.46 (6.62)   | 1.75                    | 76.91 (6.77)         | 76.85 (6.72)   | 0.06                    |
| Female, n (%)                                | 24305 (73.30) | 10429 (75.94)  | 2.64                    | 8219 (75.04)         | 8229 (75.13)   | 0.09                    |
| White, n (%)                                 | 28838 (86.98) | 11492 (83.68)  | 3.30                    | 9238 (84.34)         | 9234 (84.31)   | 0.03                    |
| <b>Health Service Utilization, mean (sd)</b> |               |                |                         |                      |                |                         |
| Days Hospitalized                            | 3.10 (6.52)   | 2.13 (5.34)    | 0.97                    | 2.44 (5.71)          | 2.29 (5.59)    | 0.15                    |
| # Hospitalizations                           | 0.36 (0.57)   | 0.27 (0.51)    | 0.09                    | 0.29 (0.52)          | 0.28 (0.52)    | 0.01                    |
| Days in Nursing Home                         | 1.47 (5.98)   | 0.94 (4.92)    | 0.53                    | 1.16 (5.18)          | 1.06 (5.24)    | 0.10                    |
| # Nursing Home Admissions                    | 0.09 (0.31)   | 0.06 (0.25)    | 0.03                    | 0.07 (0.27)          | 0.07 (0.26)    | 0.00                    |
| # Visits                                     | 4.87 (4.30)   | 5.18 (4.10)    | 0.31                    | 5.11 (4.37)          | 5.09 (4.05)    | 0.02                    |
| # Generic Meds                               | 7.50 (4.79)   | 8.73 (4.92)    | 1.23                    | 8.37 (5.05)          | 8.33 (4.83)    | 0.04                    |
| # Diabetes Visits                            | 2.69 (3.28)   | 3.54 (3.59)    | 0.85                    | 3.34 (3.82)          | 3.27 (3.51)    | 0.07                    |
| # Diabetes Hospitalizations                  | 0.30 (0.67)   | 0.26 (0.66)    | 0.04                    | 0.29 (0.69)          | 0.27 (0.67)    | 0.02                    |
| <b>Prior Drug Use, n (%)</b>                 |               |                |                         |                      |                |                         |
| Acarbose                                     | 199 (0.60)    | 142 (1.03)     | 0.43                    | 102 (0.93)           | 104 (0.95)     | 0.02                    |
| Exanatide                                    | 1 (0.00)      | 2 (0.01)       | 0.01                    | 1 (0.01)             | 2 (0.02)       | 0.01                    |
| Insulin                                      | 2956 (8.92)   | 5550 (40.41)   | 31.49                   | 2846 (25.98)         | 2954 (26.97)   | 0.99                    |
| Metformin                                    | 5310 (16.02)  | 3194 (23.26)   | 7.24                    | 2724 (24.87)         | 2591 (23.66)   | 1.21                    |
| Miglitol                                     | 46 (0.14)     | 37 (0.27)      | 0.13                    | 27 (0.25)            | 27 (0.25)      | 0.00                    |
| Nateglinide                                  | 251 (0.76)    | 304 (2.21)     | 1.45                    | 215 (1.96)           | 224 (2.05)     | 0.09                    |
| Repaglinide                                  | 624 (1.88)    | 633 (4.61)     | 2.73                    | 455 (4.15)           | 468 (4.27)     | 0.12                    |
| ACE inhibitors                               | 11310 (34.11) | 5449 (39.68)   | 5.57                    | 4164 (38.02)         | 4146 (37.85)   | 0.17                    |
| Angiotensin Receptor Blockers                | 3856 (11.63)  | 2381 (17.38)   | 5.75                    | 1882 (17.18)         | 1899 (17.34)   | 0.16                    |
| Alpha Blockers                               | 2436 (7.35)   | 1160 (8.45)    | 1.10                    | 904 (8.25)           | 902 (8.24)     | 0.01                    |
| Antiarrhythmics                              | 1031 (3.11)   | 369 (2.69)     | 0.42                    | 299 (2.73)           | 294 (2.68)     | 0.05                    |
| Antiplatelets                                | 2283 (6.89)   | 1225 (8.92)    | 2.03                    | 988 (9.02)           | 977 (8.92)     | 0.10                    |
| Beta Blockers                                | 11927 (35.97) | 5251 (38.23)   | 2.26                    | 4199 (38.34)         | 4202 (38.36)   | 0.02                    |
| Bisphosphonates                              | 1560 (4.71)   | 847 (6.17)     | 1.46                    | 732 (6.68)           | 705 (6.44)     | 0.24                    |
| Calcium Channel Blockers                     | 11147 (33.62) | 4746 (34.56)   | 0.94                    | 3646 (33.29)         | 3703 (33.81)   | 0.52                    |
| COX2 Inhibitors                              | 3299 (9.95)   | 1811 (13.19)   | 3.24                    | 1565 (14.29)         | 1484 (13.55)   | 0.74                    |
| Digoxin                                      | 5667 (17.09)  | 2039 (14.85)   | 2.24                    | 1600 (14.61)         | 1605 (14.65)   | 0.04                    |

| Confounder                                                 | Unmatched        |                |                         | Matched*        |                |                         |
|------------------------------------------------------------|------------------|----------------|-------------------------|-----------------|----------------|-------------------------|
|                                                            | SU (N=34,424)    | TZD (N=14,279) | Absolute Difference (%) | SU (N=10,953)   | TZD (N=10,953) | Absolute Difference (%) |
| Estrogens                                                  | 1035 (3.12)      | 483 (3.52)     | 0.40                    | 383 (3.50)      | 373 (3.41)     | 0.09                    |
| H2 Antagonists                                             | 3656 (11.03)     | 1258 (9.16)    | 1.87                    | 955 (8.72)      | 966 (8.82)     | 0.10                    |
| Drugs that cause hepatotoxicity                            | 19982 (60.27)    | 8429 (61.37)   | 1.10                    | 6600 (60.26)    | 6567 (59.96)   | 0.30                    |
| Loop diuretics                                             | 9248 (27.89)     | 3964 (28.86)   | 0.97                    | 2940 (26.84)    | 3018 (27.55)   | 0.71                    |
| Non-selective NSAIDs                                       | 4367 (13.17)     | 1886 (13.73)   | 0.56                    | 1397 (12.75)    | 1445 (13.19)   | 0.44                    |
| Nitrates                                                   | 6820 (20.57)     | 2808 (20.45)   | 0.12                    | 2076 (18.95)    | 2132 (19.46)   | 0.51                    |
| Other lipid lowering drugs                                 | 1584 (4.78)      | 986 (7.18)     | 2.40                    | 806 (7.36)      | 791 (7.22)     | 0.14                    |
| Others cardiovascular drugs                                | 1301 (3.92)      | 578 (4.21)     | 0.29                    | 428 (3.91)      | 447 (4.08)     | 0.17                    |
| Parkinsonism inducing medication                           | 2496 (7.53)      | 953 (6.94)     | 0.59                    | 758 (6.92)      | 725 (6.62)     | 0.30                    |
| Potassium sparing agents                                   | 2755 (8.31)      | 994 (7.24)     | 1.07                    | 855 (7.81)      | 823 (7.51)     | 0.30                    |
| Proton pump inhibitors                                     | 3815 (11.51)     | 1874 (13.64)   | 2.13                    | 1636 (14.94)    | 1557 (14.22)   | 0.72                    |
| Statins                                                    | 9204 (27.76)     | 5294 (38.55)   | 10.79                   | 4249 (38.79)    | 4175 (38.12)   | 0.67                    |
| Thiazides                                                  | 7648 (23.07)     | 3485 (25.37)   | 2.30                    | 2881 (26.30)    | 2845 (25.97)   | 0.33                    |
| Thyroid                                                    | 4475 (13.50)     | 2077 (15.12)   | 1.62                    | 1642 (14.99)    | 1641 (14.98)   | 0.01                    |
| Warfarin                                                   | 4197 (12.66)     | 1482 (10.79)   | 1.87                    | 1230 (11.23)    | 1191 (10.87)   | 0.36                    |
| Metformin Combination Therapy                              | 1708 (5.15)      | 709 (5.16)     | 0.01                    | 693 (6.33)      | 661 (6.03)     | 0.30                    |
| <b>Clinical Conditions, n (%) [unless otherwise noted]</b> |                  |                |                         |                 |                |                         |
| Combined Comorbidity Score, mean (sd)                      | 1.74 (2.57)      | 1.46 (2.34)    | 0.28                    | 1.50 (2.45)     | 1.47 (2.39)    | 0.03                    |
| Alzheimer's disease                                        | 2386 (7.20)      | 785 (5.72)     | 1.48                    | 701 (6.40)      | 660 (6.03)     | 0.37                    |
| Atrial Fibrillation                                        | 1280 (3.86)      | 340 (2.48)     | 1.38                    | 311 (2.84)      | 292 (2.67)     | 0.17                    |
| Alcohol Abuse                                              | 117 (0.35)       | 28 (0.20)      | 0.15                    | 28 (0.26)       | 28 (0.26)      | 0.00                    |
| Angina                                                     | 3651 (11.01)     | 1435 (10.45)   | 0.56                    | 1105 (10.09)    | 1101 (10.05)   | 0.04                    |
| History of CABG before baseline period                     | 1969 (5.94)      | 828 (6.03)     | 0.09                    | 647 (5.91)      | 649 (5.93)     | 0.02                    |
| CABG during baseline period                                | 318 (0.96)       | 110 (0.80)     | 0.16                    | 94 (0.86)       | 88 (0.80)      | 0.06                    |
| Congestive Heart Failure                                   | 8719 (26.30)     | 2962 (21.57)   | 4.73                    | 2392 (21.84)    | 2403 (21.94)   | 0.10                    |
| Chronic Obstructive Pulmonary Disease                      | 3080 (9.29)      | 879 (6.40)     | 2.89                    | 764 (6.98)      | 741 (6.77)     | 0.21                    |
| Cancer                                                     | 5540 (16.71)     | 2014 (14.66)   | 2.05                    | 1696 (15.48)    | 1677 (15.31)   | 0.17                    |
| Chronic kidney disease                                     | 1331 (4.01)      | 623 (4.54)     | 0.53                    | 513 (4.68)      | 481 (4.39)     | 0.29                    |
| Coronary artery disease                                    | 12967 (39.11)    | 5186 (37.76)   | 1.35                    | 4102 (37.45)    | 4055 (37.02)   | 0.43                    |
| Depression                                                 | 997 (3.01)       | 380 (2.77)     | 0.24                    | 326 (2.98)      | 311 (2.84)     | 0.14                    |
| End Stage Renal Disease                                    | 11 (0.03)        | 5 (0.04)       | 0.01                    | 5 (0.05)        | 3 (0.03)       | 0.02                    |
|                                                            | <b>Unmatched</b> |                |                         | <b>Matched*</b> |                |                         |

| Confounder                           | SU (N=34,424) | TZD (N=14,279) | Absolute Difference (%) | SU (N=10,953) | TZD (N=10,953) | Absolute Difference (%) |
|--------------------------------------|---------------|----------------|-------------------------|---------------|----------------|-------------------------|
| Gastroparesis                        | 98 (0.30)     | 76 (0.55)      | 0.25                    | 55 (0.50)     | 59 (0.54)      | 0.04                    |
| Gout                                 | 984 (2.97)    | 322 (2.34)     | 0.63                    | 292 (2.67)    | 279 (2.55)     | 0.12                    |
| HIV/AIDS                             | 19 (0.06)     | 5 (0.04)       | 0.02                    | 6 (0.05)      | 5 (0.05)       | 0.00                    |
| Hyperlipidemia                       | 14396 (43.42) | 7328 (53.36)   | 9.94                    | 5995 (54.73)  | 5875 (53.64)   | 1.09                    |
| Hypothyroidism                       | 6250 (18.85)  | 2904 (21.14)   | 2.29                    | 2315 (21.14)  | 2303 (21.03)   | 0.11                    |
| Illicit drug use                     | 38 (0.11)     | 7 (0.05)       | 0.06                    | 5 (0.05)      | 7 (0.06)       | 0.01                    |
| Inflammatory arthritis               | 7955 (23.99)  | 3050 (22.21)   | 1.78                    | 2486 (22.70)  | 2499 (22.82)   | 0.12                    |
| Nephropathy                          | 12 (0.04)     | 6 (0.04)       | 0.00                    | 5 (0.05)      | 4 (0.04)       | 0.01                    |
| Neuropathy                           | 2083 (6.28)   | 1597 (11.63)   | 5.35                    | 1096 (10.01)  | 1083 (9.89)    | 0.12                    |
| History of MI before baseline period | 1869 (5.64)   | 618 (4.50)     | 1.14                    | 540 (4.93)    | 518 (4.73)     | 0.20                    |
| MI during baseline period            | 1494 (4.51)   | 436 (3.17)     | 1.34                    | 373 (3.41)    | 399 (3.50)     | 0.09                    |
| Obesity                              | 1265 (3.82)   | 667 (4.86)     | 1.04                    | 511 (4.67)    | 508 (4.64)     | 0.03                    |
| Peripheral Vascular Disease          | 4746 (14.31)  | 2035 (14.82)   | 0.51                    | 1529 (13.96)  | 1526 (13.93)   | 0.03                    |
| Palpitations                         | 971 (2.93)    | 394 (2.87)     | 0.06                    | 331 (3.02)    | 320 (2.92)     | 0.10                    |
| Peptic ulcer                         | 1998 (6.03)   | 768 (5.59)     | 0.44                    | 619 (5.65)    | 625 (5.71)     | 0.06                    |
| Retinopathy                          | 2028 (6.12)   | 1985 (14.45)   | 8.33                    | 1183 (10.80)  | 1213 (11.07)   | 0.27                    |
| Stroke                               | 3224 (9.72)   | 1216 (8.29)    | 1.43                    | 959 (8.76)    | 919 (8.39)     | 0.37                    |
| Transient Ischemic Attack            | 1597 (4.82)   | 563 (4.10)     | 0.72                    | 518 (4.54)    | 452 (4.13)     | 0.41                    |
| Angiography                          | 1224 (3.69)   | 457 (3.33)     | 0.36                    | 366 (3.34)    | 377 (3.44)     | 0.10                    |
| Dialysis                             | 174 (0.52)    | 79 (0.58)      | 0.06                    | 71 (0.65)     | 66 (0.60)      | 0.05                    |
| Stent                                | 281 (0.85)    | 118 (0.86)     | 0.01                    | 87 (0.79)     | 93 (0.85)      | 0.06                    |
| Hypertension                         | 23986 (72.34) | 10248 (74.62)  | 2.28                    | 8281 (75.60)  | 8200 (74.87)   | 0.73                    |
| Liver Disease                        | 1213 (3.66)   | 418 (3.04)     | 0.62                    | 372 (3.40)    | 350 (3.20)     | 0.20                    |

ACE - Angiotensin converting enzyme inhibitor; COX2 – Cyclooxygenase 2; NSAID - Nonsteroidal anti-inflammatory drug; CABG - Coronary artery bypass graft; MI - Myocardial infarction; sd – standard deviation

<sup>a</sup> Note: Matched covariate comparison is based on patients included in the 'any exposure' analysis. Covariate information for sulfonylurea patients is based on a random sample of one sulfonylurea user from each matched set, as described in the statistical analysis section.

**Web Table 2. Results from ITT analysis of secondary cohort**

|                     | Haz. Ratio (95% CI) | # Patients | # Total Events | # TZD Users | # TZD Events | # SU Users | # SU Events |
|---------------------|---------------------|------------|----------------|-------------|--------------|------------|-------------|
| <b>Any Exposure</b> | 1.18 (0.89, 1.56)   | 42680      | 295            | 10953       | 74           | 31727      | 221         |
| <b>3 months</b>     | 1.28 (0.94, 1.72)   | 38359      | 243            | 9881        | 65           | 28478      | 178         |
| <b>4 months</b>     | 1.17 (0.83, 1.64)   | 29066      | 199            | 7476        | 49           | 21590      | 150         |
| <b>5 months</b>     | 1.23 (0.86, 1.77)   | 26672      | 176            | 6813        | 45           | 19859      | 131         |
| <b>6 months</b>     | 1.09 (0.73, 1.62)   | 24115      | 152            | 6112        | 36           | 18003      | 116         |
| <b>7 months</b>     | 1.02 (0.67, 1.56)   | 21908      | 138            | 5517        | 31           | 16391      | 107         |
| <b>8 months</b>     | 1.25 (0.82, 1.88)   | 20413      | 134            | 5146        | 34           | 15267      | 100         |
| <b>9 months</b>     | 1.11 (0.72, 1.71)   | 18977      | 125            | 4773        | 30           | 14244      | 95          |
| <b>10 months</b>    | 1.30 (0.84, 2.02)   | 17687      | 118            | 4360        | 30           | 13327      | 88          |

**Web Table 3. Results from AT analysis of primary cohort**

|                     | Haz. Ratio (95% CI) | # Patients | # Total Events | # TZD Users | # TZD Events | # SU Users | # SU Events |
|---------------------|---------------------|------------|----------------|-------------|--------------|------------|-------------|
| <b>Any exposure</b> | 0.74 (0.36, 1.51)   | 25508      | 74             | 5225        | 9            | 20283      | 65          |
| <b>3 months</b>     | 0.60 (0.24, 1.53)   | 23158      | 60             | 4746        | 5            | 18412      | 55          |
| <b>4 months</b>     | 0.66 (0.26, 1.70)   | 17504      | 54             | 3590        | 5            | 13914      | 49          |
| <b>5 months</b>     | 0.55 (0.19, 1.56)   | 16076      | 48             | 3267        | 4            | 12809      | 44          |
| <b>6 months</b>     | 0.54 (0.16, 1.77)   | 14551      | 43             | 2956        | 3            | 11595      | 40          |
| <b>7 months</b>     | 0.59 (0.18, 1.95)   | 13317      | 40             | 2664        | 3            | 10653      | 37          |
| <b>8 months</b>     | 0.60 (0.18, 1.99)   | 12450      | 40             | 2477        | 3            | 9973       | 37          |
| <b>9 months</b>     | 0.66 (0.20, 2.21)   | 11541      | 38             | 2289        | 3            | 9252       | 35          |
| <b>10 months</b>    | 0.84 (0.25, 2.83)   | 10785      | 35             | 2128        | 3            | 8657       | 32          |

**Web Table 4. Results from AT analysis of secondary cohort**

|                     | <b>Haz. Ratio (95% CI)</b> | <b># Patients</b> | <b># Total Events</b> | <b># TZD Users</b> | <b># TZD Events</b> | <b># SU Users</b> | <b># SU Events</b> |
|---------------------|----------------------------|-------------------|-----------------------|--------------------|---------------------|-------------------|--------------------|
| <b>Any Exposure</b> | 1.01 (0.65, 1.56)          | 42680             | 137                   | 10953              | 28                  | 31727             | 109                |
| <b>3 months</b>     | 1.04 (0.60, 1.79)          | 38359             | 94                    | 9881               | 18                  | 28478             | 76                 |
| <b>4 months</b>     | 0.98 (0.55, 1.72)          | 29066             | 92                    | 7476               | 16                  | 21590             | 76                 |
| <b>5 months</b>     | 1.19 (0.68, 2.07)          | 26672             | 83                    | 6813               | 18                  | 19859             | 65                 |
| <b>6 months</b>     | 0.97 (0.52, 1.83)          | 24115             | 75                    | 6112               | 13                  | 18003             | 62                 |
| <b>7 months</b>     | 0.98 (0.50, 1.93)          | 21908             | 68                    | 5517               | 11                  | 16391             | 57                 |
| <b>8 months</b>     | 0.94 (0.46, 1.92)          | 20413             | 62                    | 5146               | 10                  | 15267             | 52                 |
| <b>9 months</b>     | 1.03 (0.52, 2.04)          | 18977             | 64                    | 4733               | 11                  | 14244             | 53                 |
| <b>10 months</b>    | 1.32 (0.65, 2.65)          | 177687            | 59                    | 4360               | 11                  | 13327             | 48                 |
